# Supplementary material
Source: Springer Nature journal article supplement (https://www.springermedizin.de/resource/supplementary/12960_2003_12_MOESM3_ESM.pdf/9569728)
Supplement: MOESM3 [file 9569728]

No. of beds

3,000

2,500

2,000

1,500

1,000

500

0

▲ No. of doctors  
● Beds : Doctors

Doctor : Bed

18

15

12

9

6

3

0

1977

1979

1981

1983

1985

1987

1989

1991

1993

1995

1997

1999

2001

Year

Rural Development  
HFA/PHC

econ.  
boom

econ.  
crisis

10.8

441

15.3

11.8

7.1

1,162

1,549

1,766

1,956

2,725

Source: Thailand Health Profile 1999-2000 [3]
